# Supplementary material for: Ocean biomass-derived feedstocks for non-isocyanate polyurethane synthesis
Source: Royal Society of Chemistry journal article supplement (doi:10.1039/d5fd00059a), 2025-05-23
Supplement: d5fd00059a1.pdf [file d5fd00059a1.pdf]

Electronic Supplementary Information for

Ocean Biomass-derived Feedstocks for Non-Isocyanate Polyurethane Synthesis

**Authors:** Jane E. Peddle, Courtney M. Laprise, Mikhailey D. Wheeler, Megan M. Fitzgerald, Francesca M. Kerton and Christopher M. Kozak\*

**Affiliations:** Department of Chemistry, Memorial University of Newfoundland, St. John's, Newfoundland, A1C 5S7, Canada

\* Corresponding authors: ckozak@mun.ca

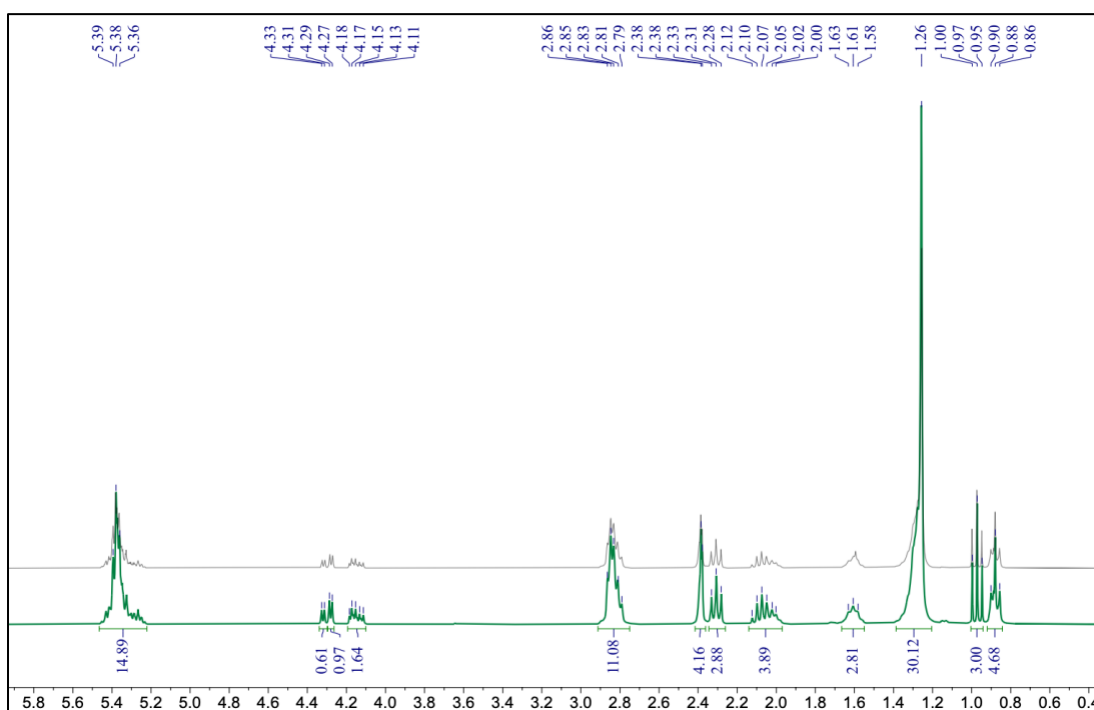

Figure S1:  $^1\text{H}$  NMR spectrum of algae oil in  $\text{CDCl}_3$ . The stability to decomposition or aerobic oxidation is demonstrated by the bottom spectrum collected 1 year prior to the upper spectrum.

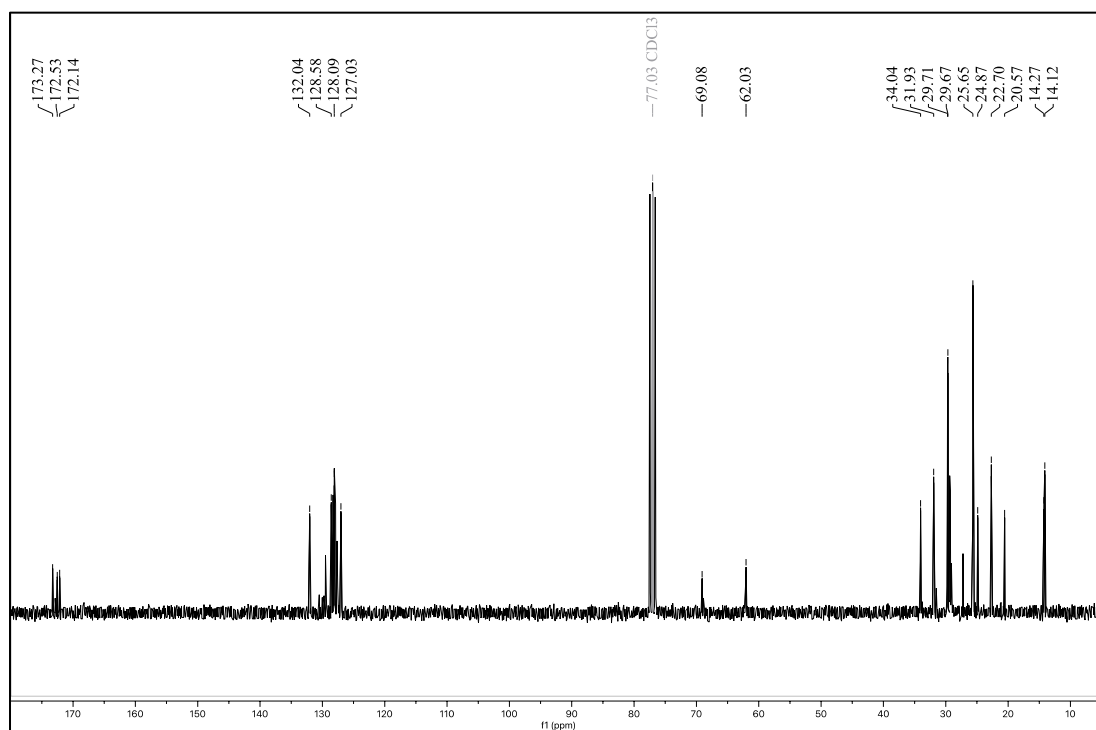

Figure S2: <sup>13</sup>C NMR spectrum of algae oil in CDCl<sub>3</sub>

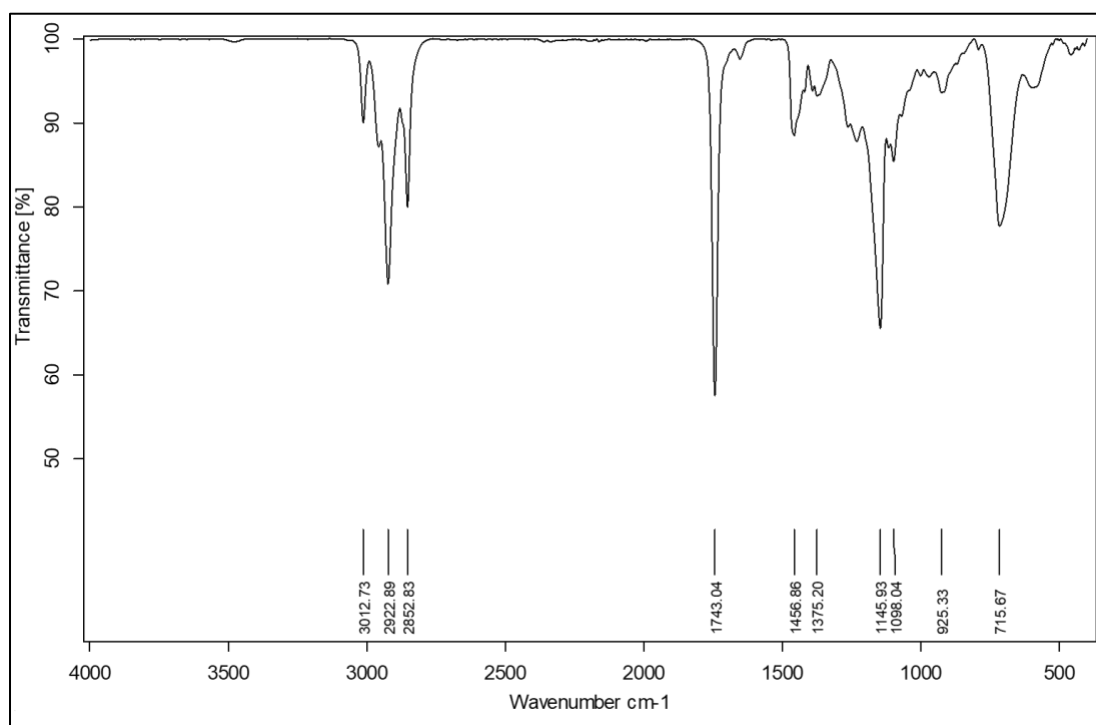

Figure S3: IR spectrum of algae oil

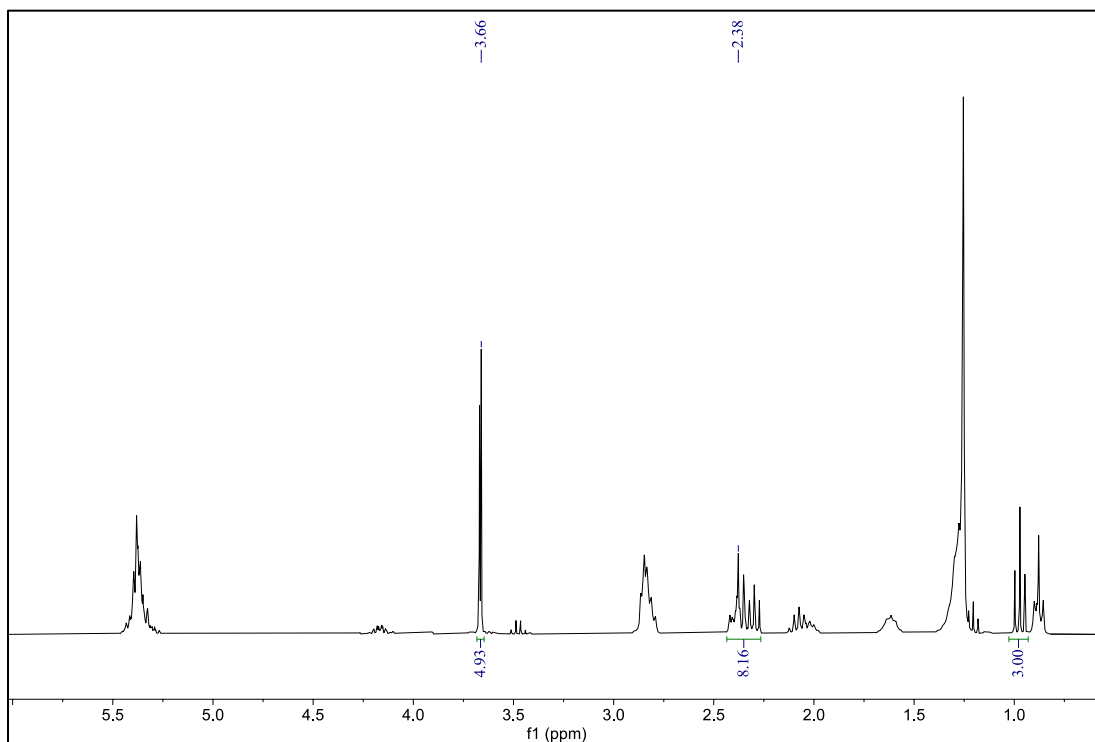

Figure S4:  $^1\text{H}$  NMR spectrum of FAMES obtained from algae oil in  $\text{CDCl}_3$ .

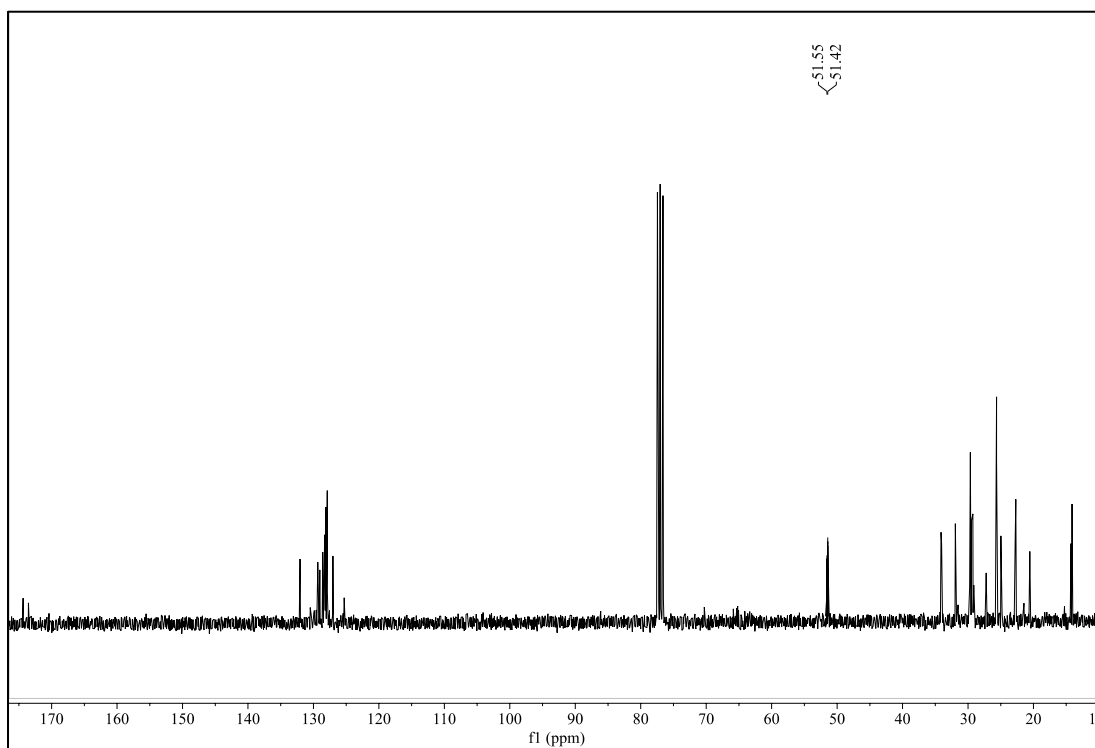

Figure S5:  $^{13}\text{C}$  NMR of FAME in  $\text{CDCl}_3$

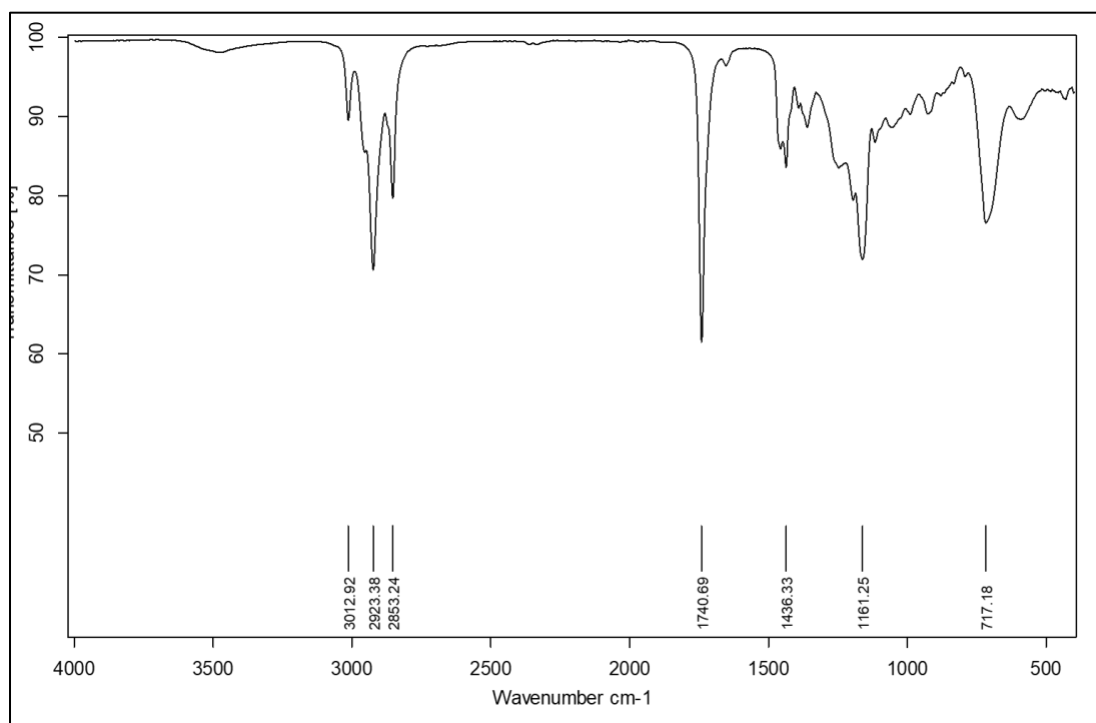

Figure S6: IR spectrum of FAME

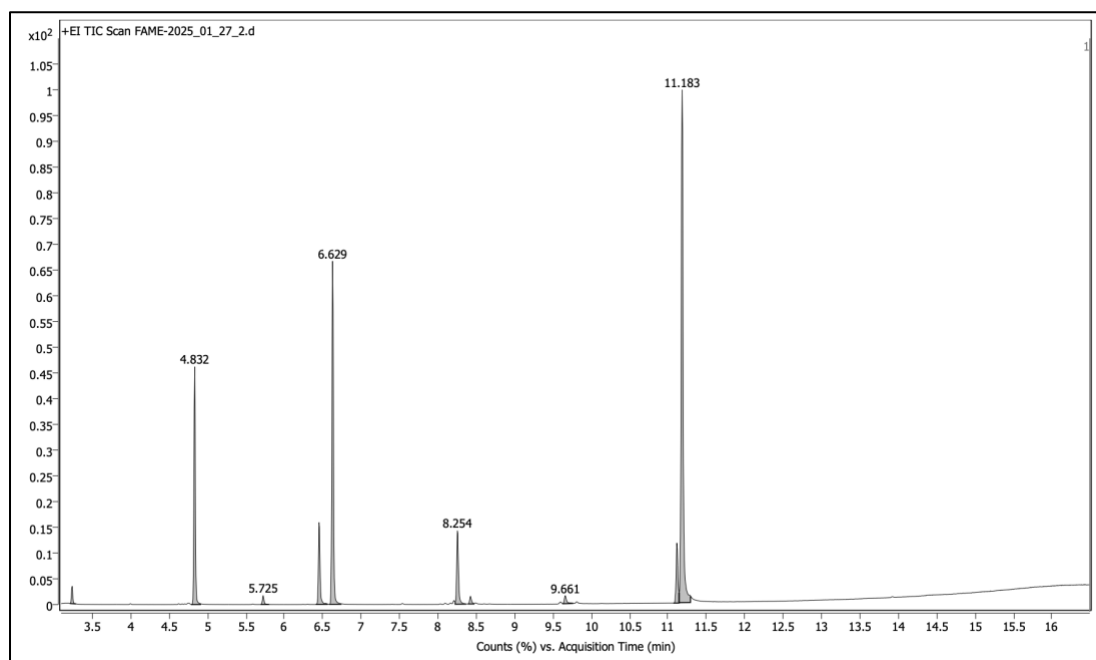

Figure S7: Gas chromatogram of FAME

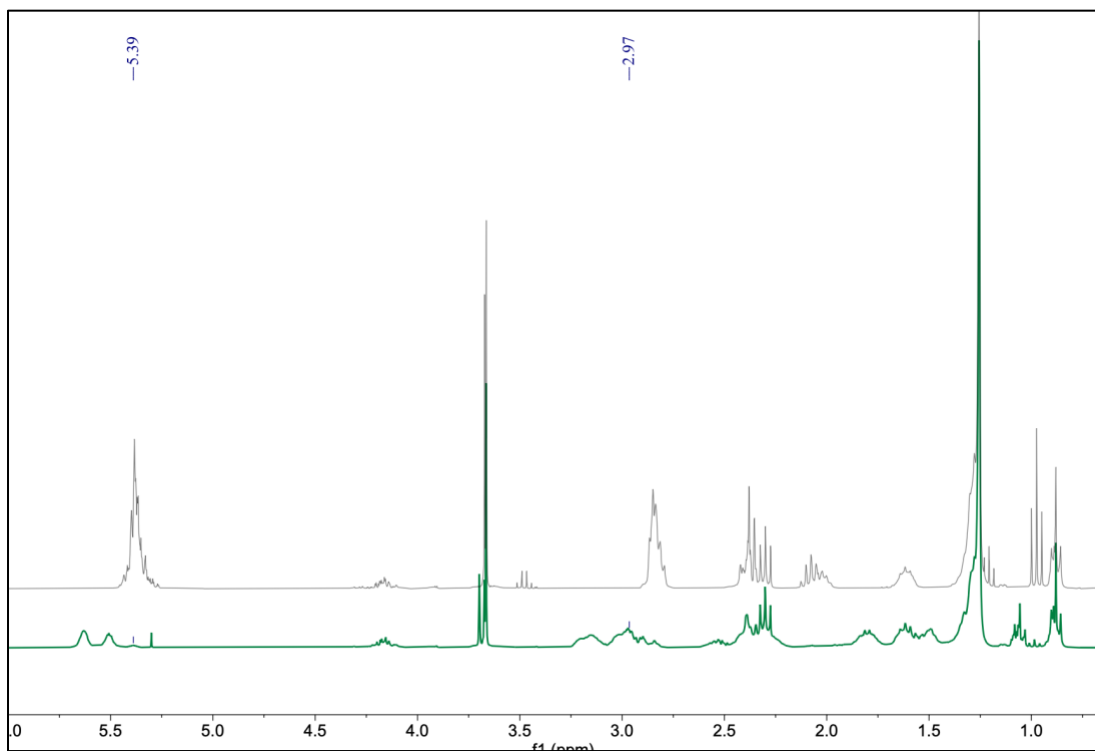

Figure S8:  $^1\text{H}$  NMR spectrum showing conversion from FAME (top, black) to epoxidized algae EFAME (bottom, green) in  $\text{CDCl}_3$

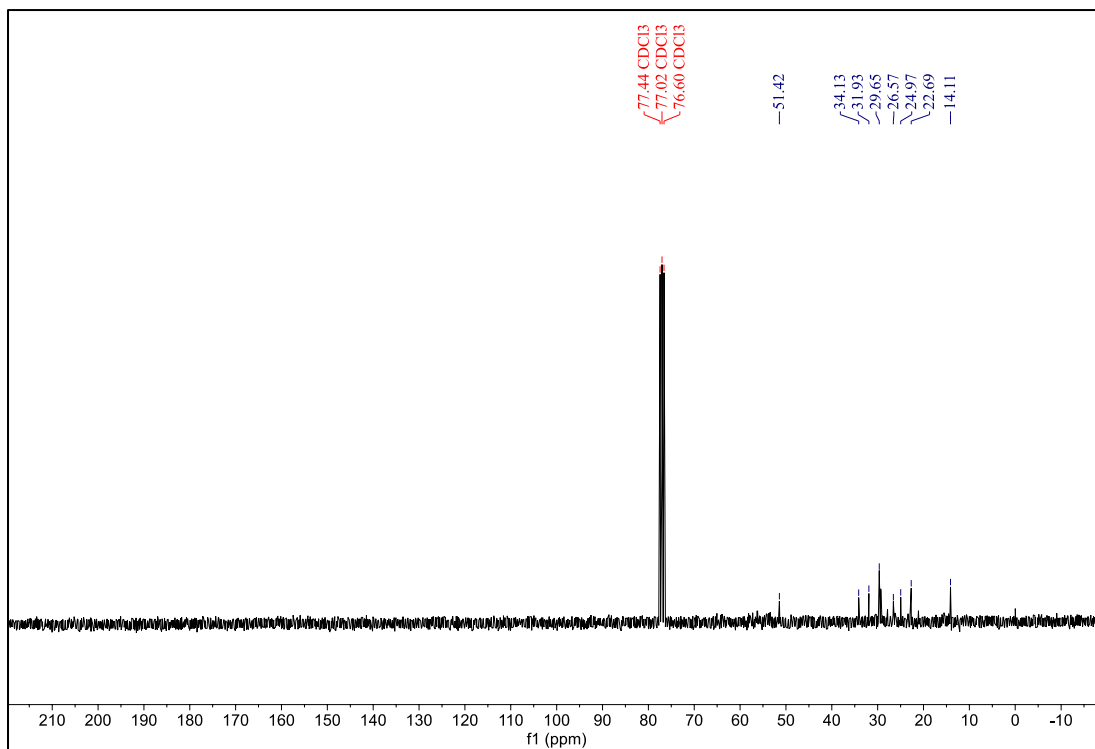

Figure S9:  $^{13}\text{C}$  NMR spectrum of EFAME in  $\text{CDCl}_3$

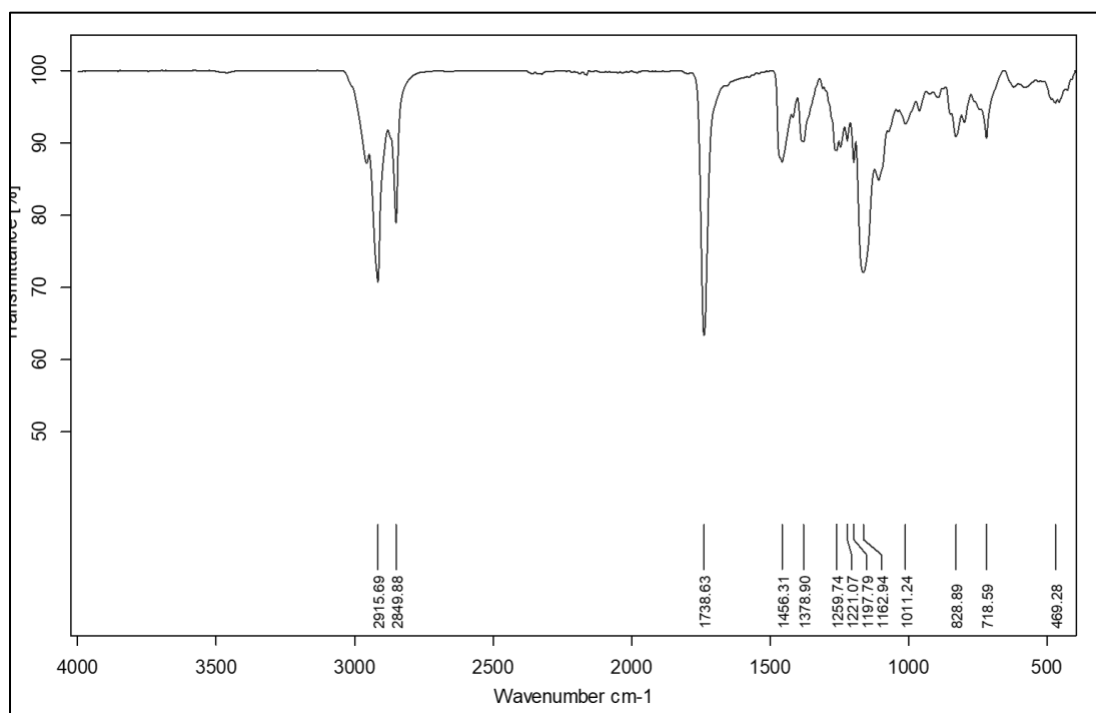

Figure S10: IR spectrum of epoxidized algae FAMES (EFAME)

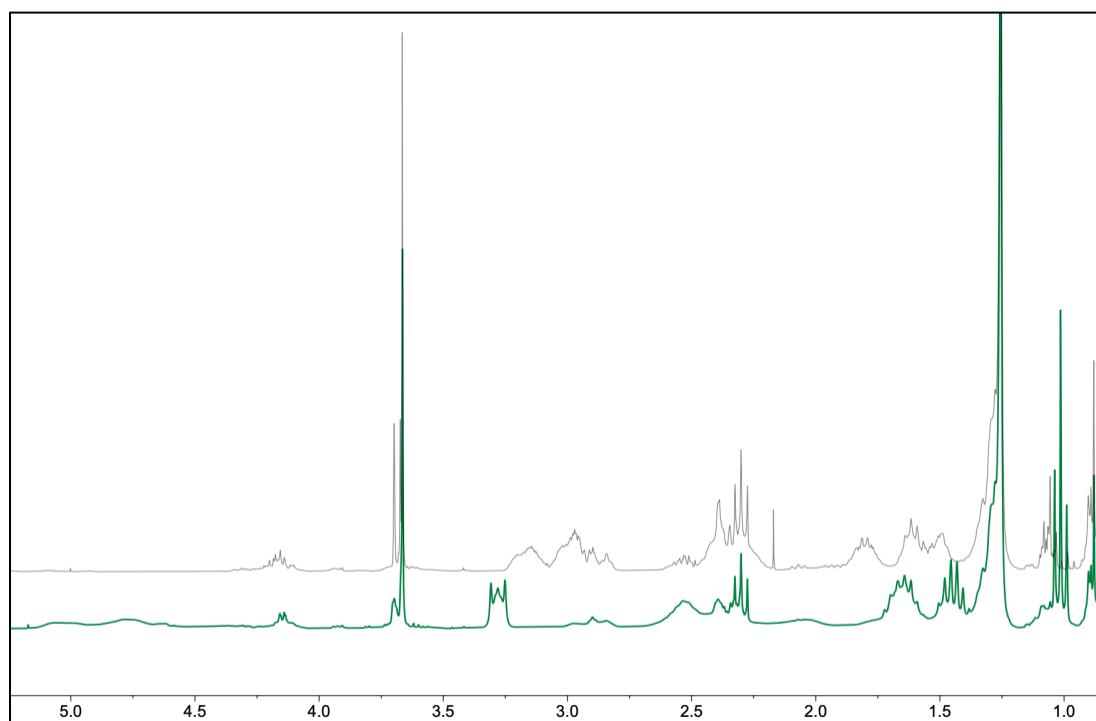

Figure S11: <sup>1</sup>H NMR spectrum showing conversion from EFAME (top, black) to CFAME (bottom, green) in CDCl<sub>3</sub>

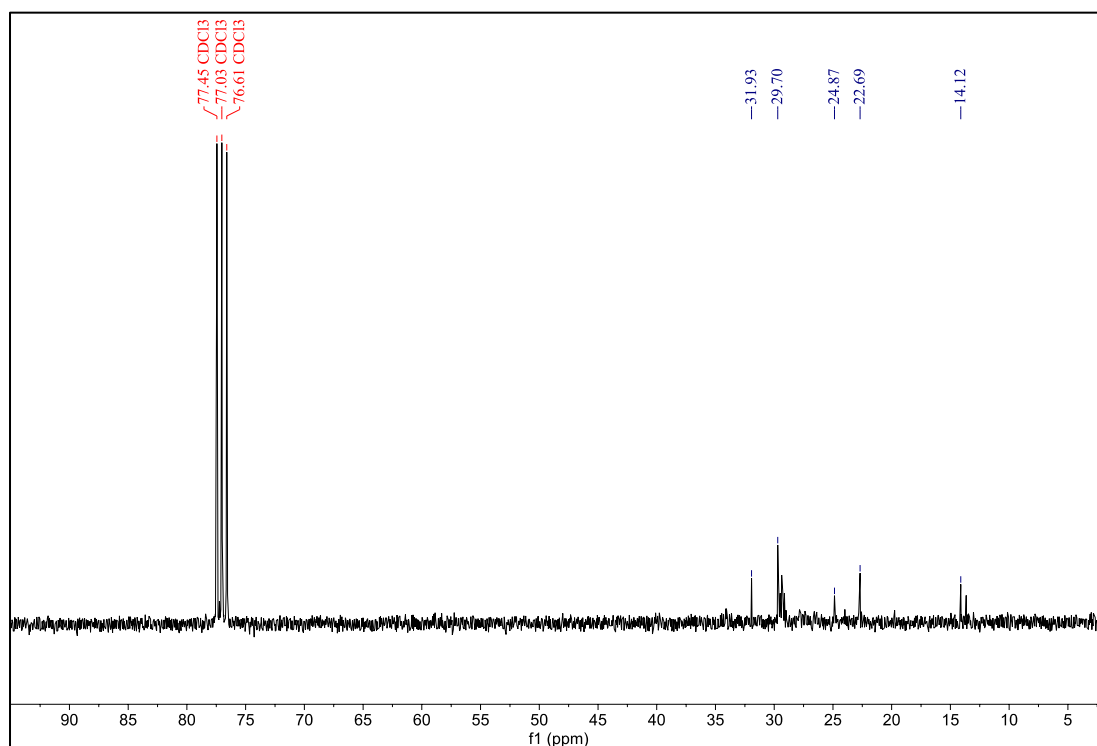

Figure S12: <sup>13</sup>C NMR spectrum of carbonated FAME (CFAME) in CDCl<sub>3</sub>

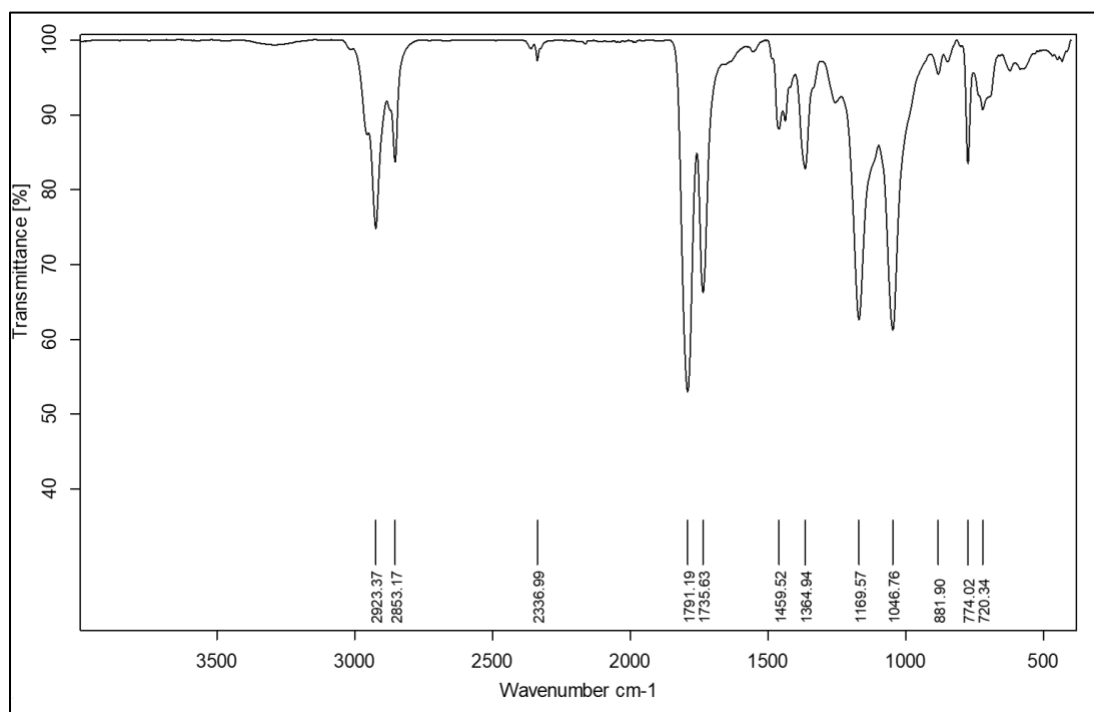

Figure S13: IR spectrum of carbonated FAME (CFAME)

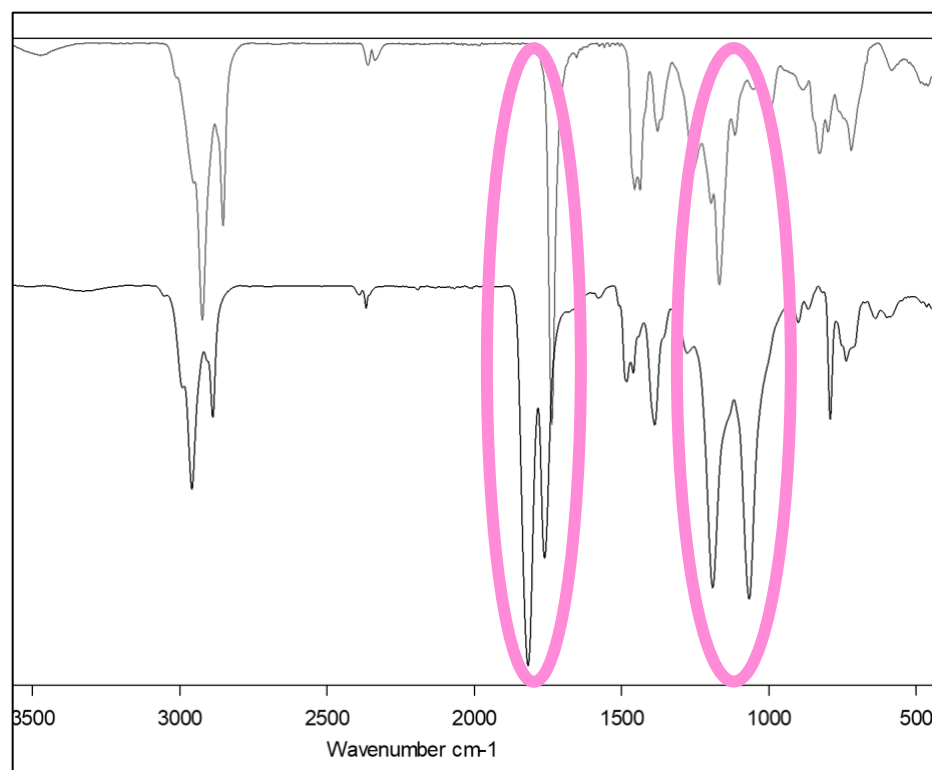

Figure S14: Comparison of IR spectra of EFAME (top) and CFAME (bottom)

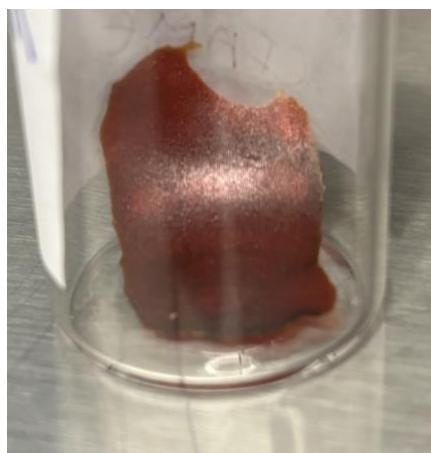

Figure S15: NIPU obtained from carbonated fatty acid methyl ester and NC-540



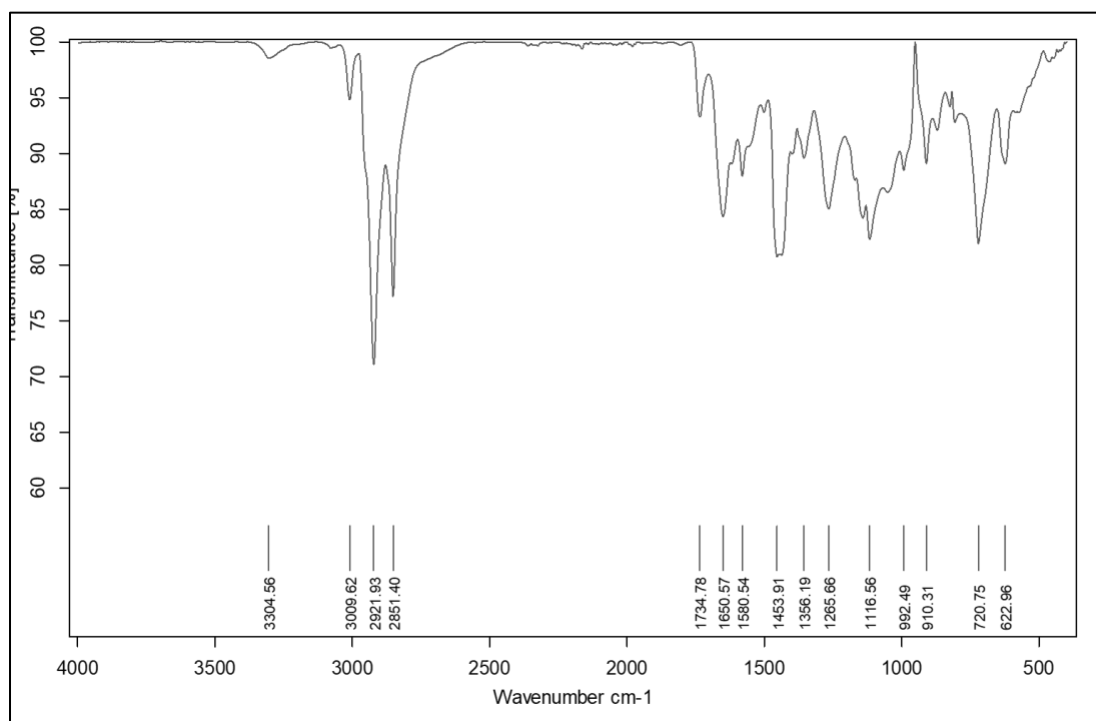

Figure S16: IR spectrum of NIPU obtained from carbonated fatty acid methyl ester and NC-540

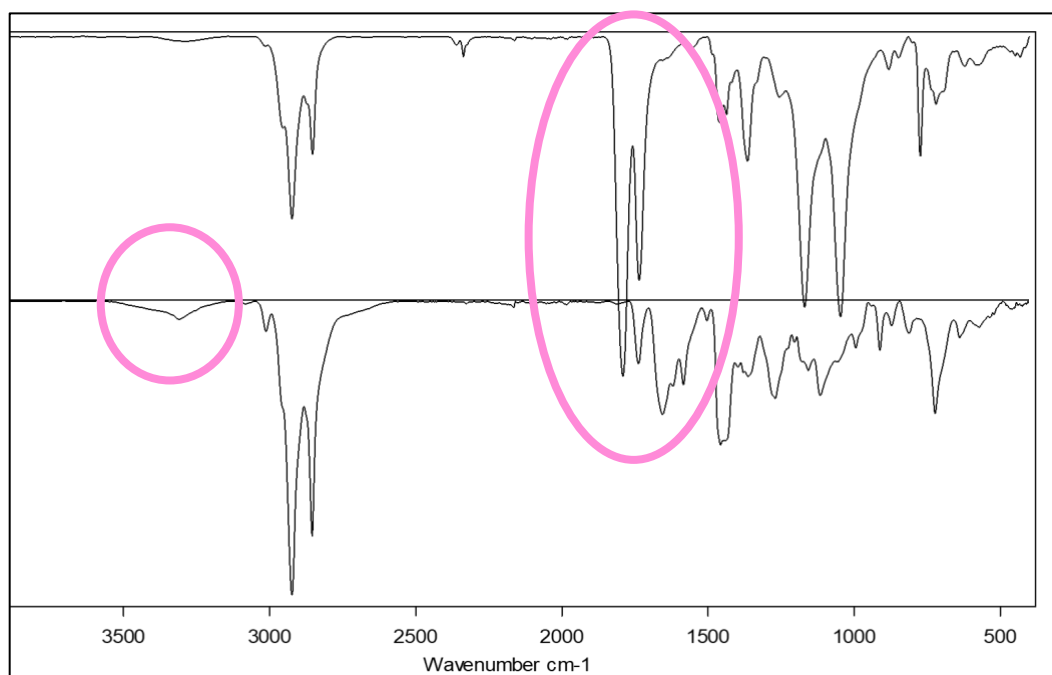

Figure S17: Comparison of IR spectra of CFAME (top) and NIPU obtained after curing with NC-540 (bottom).

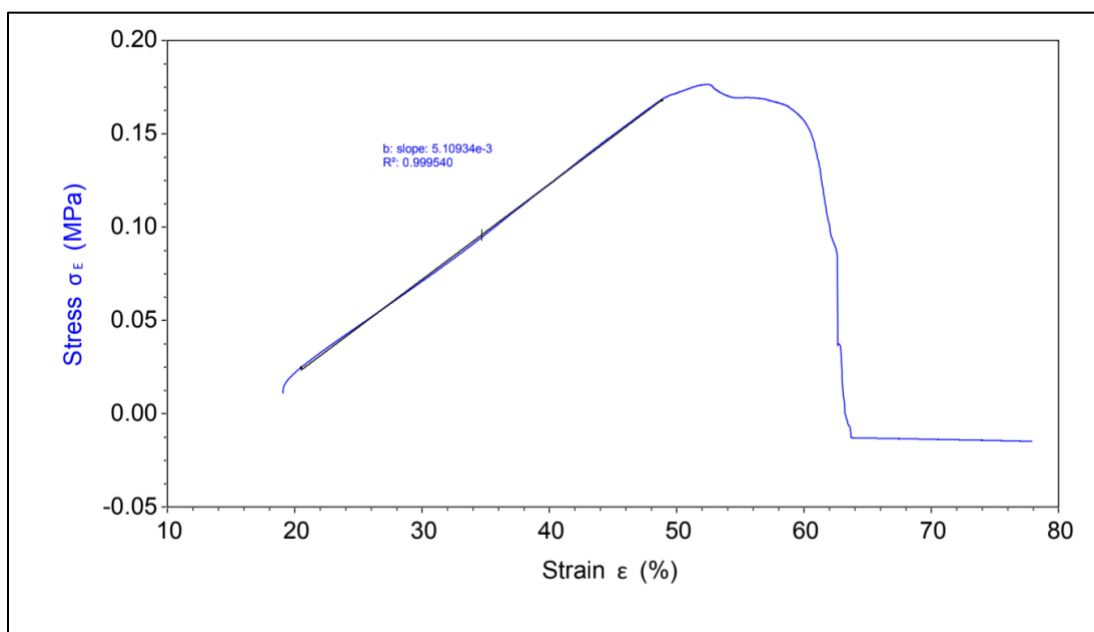

Figure S18: Stress vs. strain plot of NIPU obtained from carbonated fatty acid methyl ester and NC-540
